# Supplementary material for: Ritual Slaughter as Overlooked Risk Factor for Brucellosis
Source: PubMed Central journal article supplement (PMC4806964; doi:10.3201/eid2204.151192), 2016-04
Supplement: 15-1192-Techapp-s1.pdf [file 15-1192-Techapp-s1.pdf]

# Ritual Slaughter as Overlooked Risk Factor for Brucellosis

## Technical Appendix

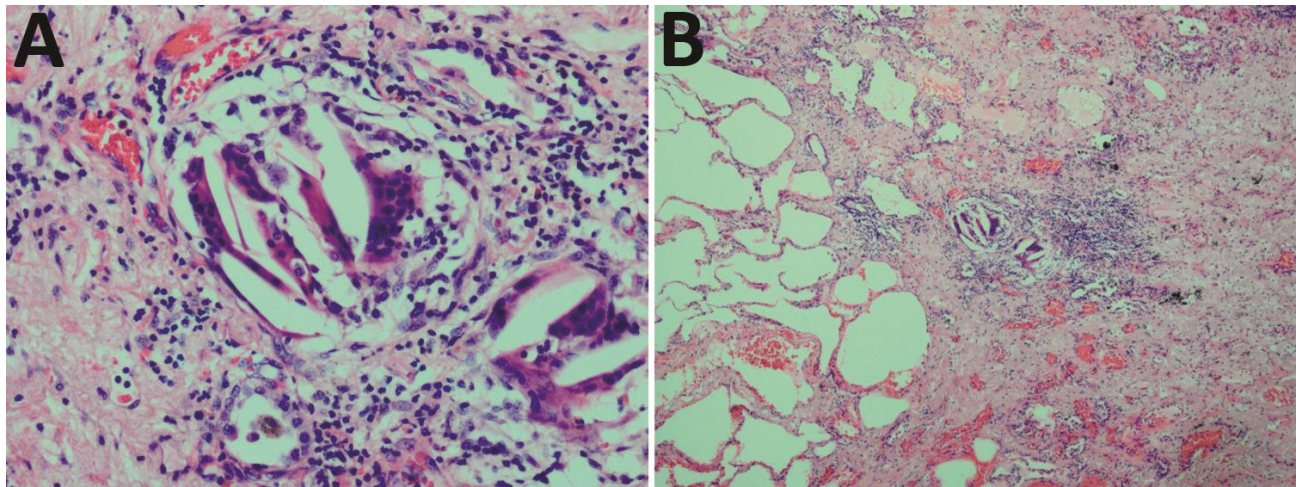

**Technical Appendix Figure.** Pathologic examination results for patient with brucellosis, Israel, 2014. A) Hematoxylin/eosin stain of lung tissue, with giant cells, surrounded predominantly by lymphocytes (original magnification  $\times 200$ ). B) Hematoxylin/eosin stain of lung tissue, showing fibrosis (right side) with a focus of giant cells, surrounded predominantly by lymphocytes (original magnification  $\times 40$ ).
